## **Complete genome screening of clinical MRSA isolates identifies lineage diversity and provides full resolution of transmission and outbreak events**

Mitchell J Sullivan<sup>1,2\*</sup>, Deena R Altman<sup>1,3\*</sup>, Kieran I Chacko<sup>1,2</sup>, Brianne Ciferri<sup>1,2</sup>, Elizabeth Webster<sup>1,2</sup>, Theodore R. Pak<sup>1,2</sup>, Gintaras Deikus<sup>1,2</sup>, Martha Lewis-Sandari<sup>1,2</sup>, Zenab Khan<sup>1,2</sup>,  
5 Colleen Beckford<sup>1,2</sup>, Angela Rendo<sup>4</sup>, Flora Samaroo<sup>4</sup>, Robert Sebra<sup>1,2</sup>, Ramona Karam-Howlin<sup>3</sup>,  
Tanis Dingle<sup>4</sup>, Camille Hamula<sup>4</sup>, Ali Bashir<sup>1,2</sup>, Eric Schadt<sup>1,2</sup>, Gopi Patel<sup>3</sup>, Frances Wallach<sup>5</sup>,  
Andrew Kasarskis<sup>1,2</sup>, Kathleen Gibbs<sup>#6</sup> and Harm van Bakel<sup>#1,2\*</sup>

1. Department of Genetics and Genomic Sciences, Icahn School of Medicine at Mount Sinai, New York City, NY, USA
- 10 2. Icahn Institute for Data Science and Genomic Technology, Icahn School of Medicine at Mount Sinai, New York City, NY, USA
3. Department of Medicine, Division of Infectious Diseases, Icahn School of Medicine at Mount Sinai, New York City, NY, USA
4. Department of Pathology, Clinical Microbiology, Icahn School of Medicine at Mount Sinai,  
15 New York City, NY, USA
5. Department of Medicine, Division of Infectious Diseases, Northwell Long Island Jewish, New York
6. Division of Neonatology and Department of Pediatrics, The Children's Hospital of Philadelphia and The University of Pennsylvania, Philadelphia, PA.

### **Correspondence to:**

Harm van Bakel (H.v.B.)  
One Gustave L. Levy Place - Box 1498  
New York, NY 10029-6574  
Phone: 212-824-8945  
25 Email: [harm.vanbakel@mssm.edu](mailto:harm.vanbakel@mssm.edu)

\* These authors contributed equally to this work

# These authors are co-senior authors on this work

## Abstract

Whole-genome sequencing (WGS) of *Staphylococcus aureus* is increasingly used as part of  
30 infection prevention practices, but most applications are focused on conserved core genomic  
regions due to limitations of short-read technologies. In this study we established a long-read  
technology-based WGS screening program of all first-episode MRSA blood infections at a major  
urban hospital. A survey of 132 MRSA genomes assembled from long reads revealed  
widespread gain/loss of accessory mobile genetic elements among established hospital- and  
35 community-associated lineages impacting >10% of each genome, and frequent  
megabase-scale inversions between endogenous prophages. We also characterized an  
outbreak of a CC5/ST105/USA100 clone among 3 adults and 18 infants in a neonatal intensive  
care unit (NICU) lasting 7 months. The pattern of changes among complete outbreak genomes  
provided full spatiotemporal resolution of its origins and progression, which was characterized  
40 by multiple sub-transmissions and likely precipitated by equipment sharing. Compared to other  
hospital strains, the outbreak strain carried distinct mutations and accessory genetic elements  
that impacted genes with roles in metabolism, resistance and persistence. This included a  
DNA-recognition domain recombination in the *hsdS* gene of a Type-I restriction-modification  
system that altered DNA methylation. RNA-Seq profiling showed that the (epi)genetic changes  
45 in the outbreak clone attenuated *agr* gene expression and upregulated genes involved in stress  
response and biofilm formation. Overall our findings demonstrate that long-read sequencing  
substantially improves our ability to characterize accessory genomic elements that impact  
MRSA virulence and persistence, and provides valuable information for infection control efforts.

## Introduction

50 Healthcare-associated infections (HAI) with methicillin-resistant *Staphylococcus aureus* (MRSA) are common, impair patient outcomes, and increase healthcare costs (Klebens et al. 2007; Grundmann et al. 2006). HAI MRSA is highly clonal and much of our understanding of its dissemination has relied on lower resolution molecular strain typing methods such as pulsed-field gel electrophoresis (PFGE), *S. aureus* protein A (*spa*) typing, and multilocus  
55 sequence typing (MLST) (DeLeo and Chambers 2009), and typically includes characterization of accessory genome elements that define certain lineages and are implicated in their virulence. Examples of the latter include the arginine catabolic mobile element (ACME), *S. aureus* pathogenicity island 5 (SaPI5) and the Panton-Valentine leukocidin (PVL)-carrying  $\phi$ Sa2 prophage in the community-associated (CA) CC8/USA300 lineage (Diep et al. 2006; DeLeo et  
60 al. 2010). Molecular typing facilitates rapid screening but has limited resolution to identify transmissions in clonal lineages. Moreover, genetic changes can lead to alteration or loss of typing elements (Glaser et al. 2016; Montgomery et al. 2009; Uhlemann et al. 2014; Planet et al. 2015). As such, WGS has emerged as the gold standard for studying lineage evolution and nosocomial outbreaks (Köser et al. 2012; Price et al. 2013). Transmission analysis with WGS  
65 has been performed largely retrospectively to date (Azarian et al. 2015; Altman et al. 2014; Harris et al. 2010; Snitkin et al. 2012), although prospective screening with resulting interventions has also been described (Eyre et al. 2012; Köser et al. 2012).

In addition to lineage and outbreak analysis, WGS has furthered our understanding of *S. aureus* pathogenicity by delineating virulence and drug resistance determinants (Mwangi et al.  
70 2007; Benson et al. 2014), including those related to adaptation to the hospital environment (Senn et al. 2016; Mwangi et al. 2007). Many of these elements are found in non-conserved

‘accessory’ genome elements that include endogenous prophages, mobile genetic element (MGE), and plasmids (Lindsay and Holden 2004; Sela et al. 2018). The repetitive nature of many of these elements means that they are often fragmented and/or incompletely represented  
75 in most WGS studies to date due to limitations of commonly used short-read sequencing technologies, curbing insights into their evolution (Sela et al. 2018). Recent advances in throughput of long-read sequencing technologies now enable routine assembly of complete genomes (Chin et al. 2013; Madoui et al. 2015) and analysis of core and accessory genome elements (Benson et al. 2014; Altman et al. 2014), including DNA methylation patterns (Fang et  
80 al. 2012), but these technologies have not yet been widely used for prospective MRSA surveillance.

Here we describe the results of a complete genome-based screening program of MRSA blood isolates. During a 16-month period we obtained finished-quality genomes for first blood isolates from all bacteremic patients. In addition to providing detailed contemporary insights into  
85 prevailing lineages and genome characteristics, we characterized widespread variation across accessory genome elements, impacting loci encoding virulence and resistance factors, including those commonly used as molecular strain typing markers. During an outbreak event in the neonatal intensive care unit (NICU) we performed additional sequencing of surveillance and clinical isolates, and were able to provide actionable information that discriminated  
90 outbreak-related transmissions, identified individual sub-transmission events, and traced the NICU outbreak origin to adult hospital wards. Finally, comparative genome and gene expression analyses of the outbreak clone to hospital background strains identified genetic and epigenetic changes, including acquisition of accessory genome elements, which may have contributed to the persistence of the outbreak clone.

95

## Results

Complete genome surveillance reveals genetic diversity among clonal MRSA lineages

In order to characterize the genetic diversity of MRSA blood infections at The Mount Sinai Hospital (MSH) in New York City, US, we sequenced the first positive isolate from all 132 MSH inpatients diagnosed with MRSA bacteremia between fall 2014 and winter 2015. Single molecule real-time (SMRT) long-read length RS-II WGS was used to obtain finished-quality chromosomes for 122 of 132 isolates (92%), along with 145 unique plasmids across isolates (**Supplemental Table 1**). The remaining isolates were in one or more chromosomal contigs that could not be closed with available long-read sequencing data. We reconstructed a phylogeny from a multi-genome alignment (**Fig. 1A, S1A**), which identified two major clades corresponding to *S. aureus* clonal complexes 8 (CC8; 45.5% of isolates) and 5 (CC5; 50% of isolates) based on the prevailing multi-locus sequence types (ST) in each clade (ST5 and ST105/ST5, respectively). The CC8 isolates further partitioned among the endemic community-associated (CA) USA300 (80%) and the hospital-associated (HA) USA500 (20%) lineages (**Fig. 1B**), while CC5 isolates mainly consisted of USA100 (75.8%) and USA800 (15.2%) HA lineages (**Fig. 1C**). Overall, the phylogeny was consistent with major *S. aureus* lineages found in the NYC region and the US (Pardos de la Gandara et al. 2016).

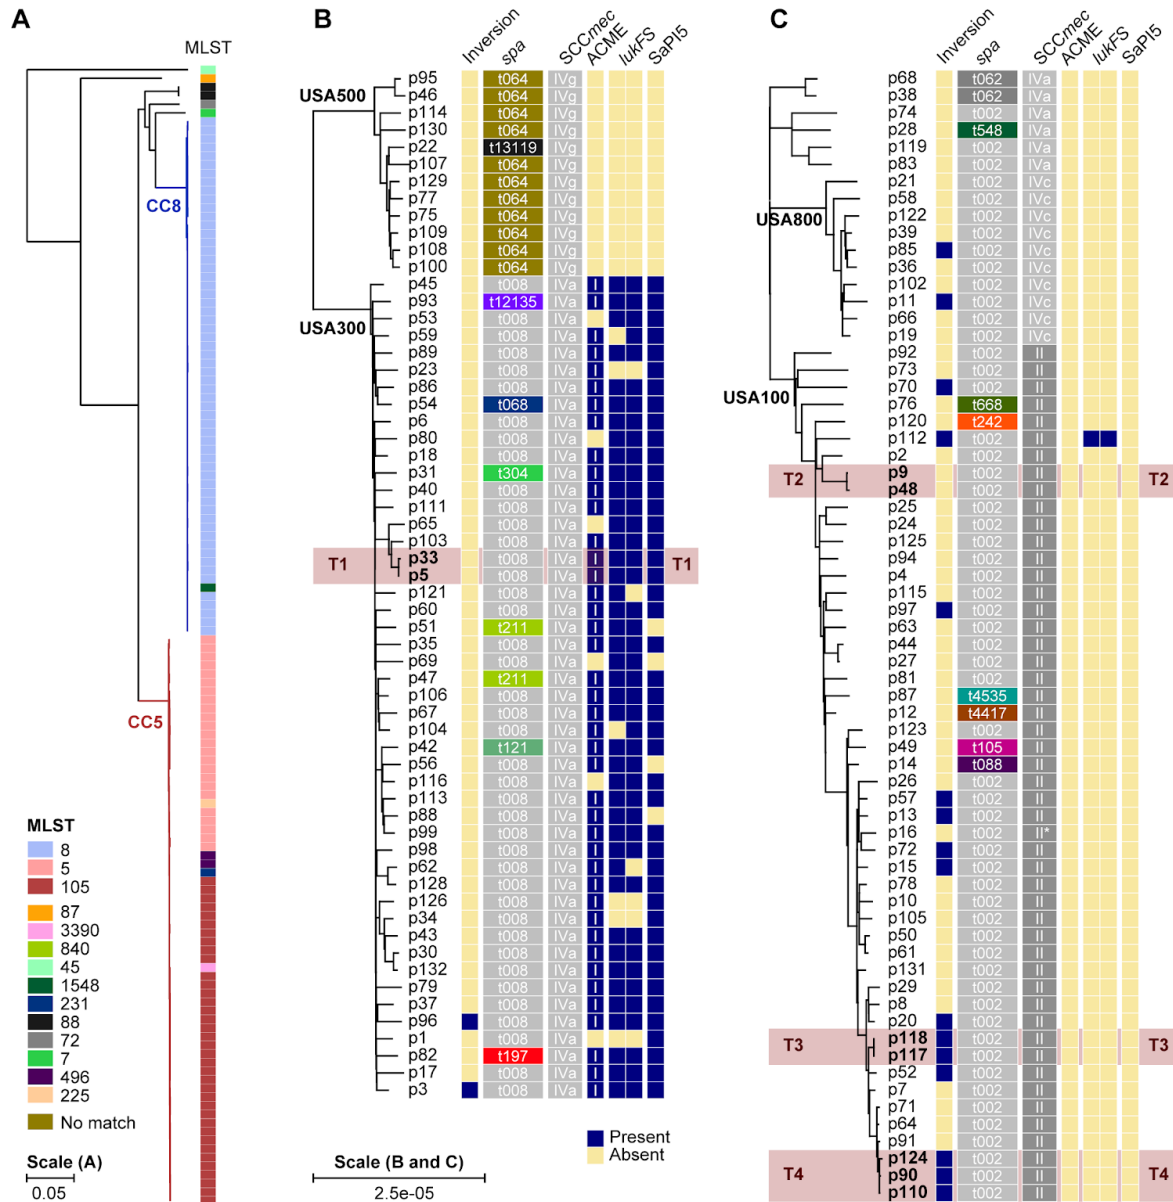

**Figure 1. Phylogeny of MRSA bacteremia surveillance isolates.**

**A)** Maximum-likelihood phylogenetic tree based on SNV distances in core genome alignments of 132 primary MRSA bacteremia isolates. CC8 and CC5 clades are shaded in red and blue, respectively. Multilocus sequence types (MLST) for each branch are shown as coloured blocks, with a key at the bottom-left. **B)** Enlarged version of the CC8 clade from A. The isolate identifier is indicated next to each branch, together with blocks denoting the presence of large inversions (>250 kb), *spa* type, *SCCmec* type, and the presence (blue) or absence (yellow) of intact ACME, *lukFS* and *SapI5* loci. The ACME type is indicated in each box. The *lukFS* locus is represented by two blocks indicating the presence of *lukF* and *lukS*, respectively. **C)** Same as B, but for the CC5 clade. Asterisk indicates a *spa* type II isolate with an inserted element in the locus. Four transmission events between patients are highlighted in red and labeled T1 to T4. Scale bars indicate the number of substitutions per site in the phylogeny.

We next examined larger (>500 bp) structural variation that may be missed by short-read based WGS approaches (Copin et al. 2017; Altman et al. 2014; Harris et al. 2010). The multi-genome alignment indicated that between 80.8-88.9% of the sequence in each genome was contained in core syntenic blocks shared among all 132 genomes (**Supplemental Fig. 1A**). Another 9.5-16.8% was contained in accessory blocks found in at least two but not all genomes. Many of these accessory genome elements were lineage-specific and associated with prophage regions and plasmids (**Supplemental Fig. 1B**). Finally, 0.8-4.5% of sequence was not found in syntenic blocks and included unique elements gained by individual isolates. For example, a 32 kbp putative integrative conjugative element (ICE) carrying genes encoding proteins involved in heavy metal resistance (cadmium, cobalt, and arsenic) and formaldehyde detoxification was inserted after the *rimH* gene in the USA800 isolate from p58 (**Supplemental Fig. 1C**). Similar arsenic resistance elements have been found in *S. aureus* isolated from poultry litter (Williams et al. 2006), which were linked to use of organic arsenic coccidiostats for growth promotion.

The extent of core and accessory genome variability impacted loci that are commonly used for molecular strain typing. Divergence from the dominant *spa* type was apparent in 8 (13.3%) of CC8 and 9 (13.6%) of CC5 lineage isolates. MLST loci were more stable in comparison with changes in 1.5% and 7.6% of isolates in each lineage, respectively. Notably, there were also widespread changes at ACME, PVL, and SaPI5 (**Fig. 1B**) in USA300 isolates, which are signature elements of this CA lineage (DeLeo et al. 2010; Diep et al. 2006) — 33.3% (16 of 48) either carried inactivating mutations or had partially or completely lost one or more elements (**Fig. 1B**). The multiple independent events of ACME, PVL and SaPI5 loss throughout the USA300 clade may reflect its ongoing adaptation to hospital environments, as these elements are typically absent in HA lineages. Interestingly, we found one case of a PVL-positive USA100 isolate (**Fig. 1C**) that may have resulted from homologous recombination between a

ΦSa2 and ΦSa2 PVL prophage (**Supplemental Fig. 2**). Thus, complete genomes of MRSA blood isolates demonstrate the mobility of the accessory genome in ways that impact commonly used *S. aureus* lineage definitions.

150 The multi-genome alignment further identified large inversions spanning >250 kbp in 18 genomes (13.6%) (**Supplemental Fig. 1A**), which were much more common in CC5 (16 inversions) vs. CC8 lineages (2 inversions) (**Fig. 1**). The ends of these large inversion events were mainly (94%) located within distinct prophage elements that shared large (>10kb) regions of high sequence similarity (>99%), which meant that the exact cross-over points could not be  
155 identified. Notably, 11 inversions spanning ~1.15 Mb occurred between ΦSa1 and ΦSa5 in CC5 isolates and could only be resolved by using raw long-read data to phase the small number of variants that uniquely differentiated each prophage (**Supplemental Fig. 3**). Other inversions involved cross-overs between prophage pairs of ΦSa1, ΦSa3, ΦSa7, and ΦSa9. The chimeric prophages that resulted from the inversions consisted of new combinations of the two original  
160 prophage elements and contained all genes necessary to produce functional phages based on PHASTER (Arndt et al. 2016) analyses. Taken together, this suggests that prophage elements are common drivers of large inversion events in *S. aureus* that contribute to prophage diversity.

#### Identification of transmission events among adults and an outbreak in the NICU

We next compared isolate genomes to identify transmissions between patients. We considered  
165 intra-host diversity and genetic drift in aggregate and set a conservative distance of ≤7 SNVs to define transmission events (see Methods). At this threshold we identified one USA300 and three USA100 transmissions involving six adults and three infants (**Fig. 1B-C**, labeled as T1-T4). Complete genome alignments for each event confirmed the absence of structural variants. In the USA300 transmission case (T1) the presumed index patient p5 was bacteremic with the



170 same clone on two occasions ~3 months apart (**Supplemental Fig. 4**). The isolate obtained from the recipient (p33), who was later admitted to the same ward for 7 days at the time of collection. The USA100 isolates in transmission T2 were collected ~4 months apart and although the patients had overlapping stays, they did not share a ward or other clear epidemiological links (**Supplemental Fig. 4**). In transmission T3, both patients shared a ward  
175 for several days (**Supplemental Fig. 4**).

The final transmission involving 3 infants (T4) was part of a larger outbreak in the NICU, where positive clinical MRSA cultures from three infants within five weeks had prompted an investigation and consultation with the New York State Department of Health (NYSDOH). During four months an additional 41 clinical and surveillance cultures from 20 infants tested positive for  
180 MRSA, bringing the total to 46 isolates from 22 infants. Three further isolates were obtained from incubators and an IV box, from a total of 123 environmental swabs (2.4 %). Positive nasal surveillance cultures were also obtained from 2 out of 130 (1.5%) healthcare workers (HCWs) who had provided direct care to newly MRSA-colonized infants. The NYSDOH performed PFGE on 22 isolates, of which 14 patient and 3 environmental isolates had nearly indistinguishable  
185 band patterns (data not shown). This included p90 and p110 in transmission T4 (**Fig. 1C**; p125 was not tested). The USA100 (ST105) outbreak clone was resistant to fluoroquinolones, clindamycin, gentamicin and mupirocin, and susceptible to vancomycin, trimethoprim-sulfamethoxazole and doxycycline (**Supplemental Fig. 5, Supplemental Table 1**). This pattern was uncommon (18.2%) among USA100 isolates in our study and was therefore  
190 used as an initial screening criteria for cases. None of the HCW isolates matched the MLST or antibiogram of the outbreak clone and both staff members were successfully decolonized with nasal mupirocin and chlorhexidine gluconate (CHG) baths.

## Complete genome surveillance resolves outbreak origin and progression

During the outbreak we expanded our genomic screening program to include the first isolate of  
195 suspected outbreak cases. From day 354 onwards we obtained 23 additional complete  
genomes (**Supplemental Table 1**). Of these, 19 genomes from 16 infants and three  
environmental isolates matched the ST105 outbreak strain type, bringing the total to 22  
outbreak genomes from 16 infants and the environment. We reconstructed a phylogenetic tree  
based on core genome alignments of all ST105 isolates in our study, which grouped all 22  
200 isolates with matching antibiograms and/or PFGE patterns in one well-defined clade (**Fig. 2A**).

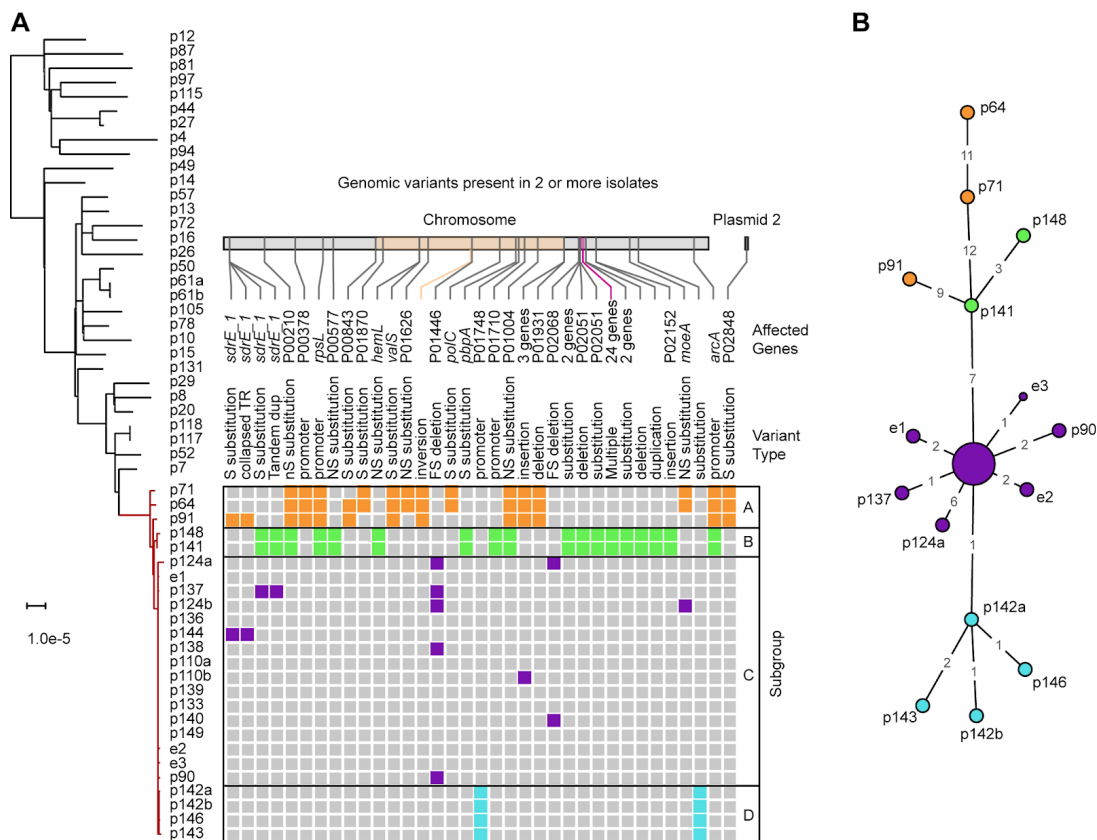

**Figure 2. NICU outbreak subgroups and association with adult bacteremia patients.**

**A)** Maximum-likelihood phylogenetic tree based on SNV distances in core genome alignments of 31  
205 ST105 primary bacteremia isolates (black) and 25 outbreak isolates (red). The scale bar indicates the  
number of substitutions per site. The patient (p) or environmental (e) isolate identifier is shown next to  
each branch (a/b suffixes indicate multiple isolates from the same patient). Variants present in two or  
more NICU outbreak isolates, derived from full-length pairwise alignments to the p133 genome, are

shown as coloured boxes. Variants are colored according to outbreak subgroups inferred from common variant patterns, as indicated on the right. For each variant the genomic location, affected genes, and type of mutation is shown above the matrix. A 2 Mbp inversion in the adult isolates and a 2,411 bp region containing two substitutions and a deletion in subgroup B is highlighted in the location bar in orange and purple, respectively. **B)** Minimum spanning tree of the 25 outbreak isolates based on SNVs identified in their complete genome alignments. The 15 labeled nodes represent individual isolates. The larger central node corresponds to ten isolates with identical core genomes, which includes the p133 reference. Nodes are colored according to the outbreak subgroups shown in panel A. Numbers at edges represent core genome SNV distances.

Surprisingly, this clade also contained 3 MRSA isolates obtained from adult bacteremia patients in other hospital wards prior to the first NICU case. The outbreak clade genomes were  $\leq 15$  SNVs apart, and the clade as a whole differed from other ST105 isolates by  $\geq 41$  SNVs. We therefore considered the 3 adult isolates to be part of a larger clonal outbreak that spanned 7 months. Based on the pattern of variants between outbreak genomes we could distinguish 4 distinct subgroups (**Fig. 2A, 2B**).

We then used the available epidemiology and genomic data to reconstruct an outbreak timeline (**Fig. 3A**). The three initial adult cases had overlapping stays and shared wards, and their isolates clustered together in subgroup A. Several of the earliest clinical isolates from infants p141, p150, and p151 that coincided with the spread of the outbreak to the NICU were not available for genomic analysis (marked X in **Fig. 3A**). The missing isolate from p141 was susceptible to gentamicin and differed from the PFGE pattern of the outbreak clone by five bands. The other two missing isolates from p150 and 151 matched the outbreak clone antibiogram and were therefore considered to be part of the outbreak. Subsequent cases were identified by positive surveillance cultures on days 357-386 and their isolates clustered in subgroup C. All but one of the infants in this subgroup stayed in NICU room 2 before or at the time of culture positivity. The three positive environmental isolates were also obtained from this room, suggesting that a local bioburden lead to a high volume of colonized infants in a short

time. Construction in the NICU and a resulting disruption of infection prevention practices was  
 235 believed to play a role in the initial transmissions of MRSA.

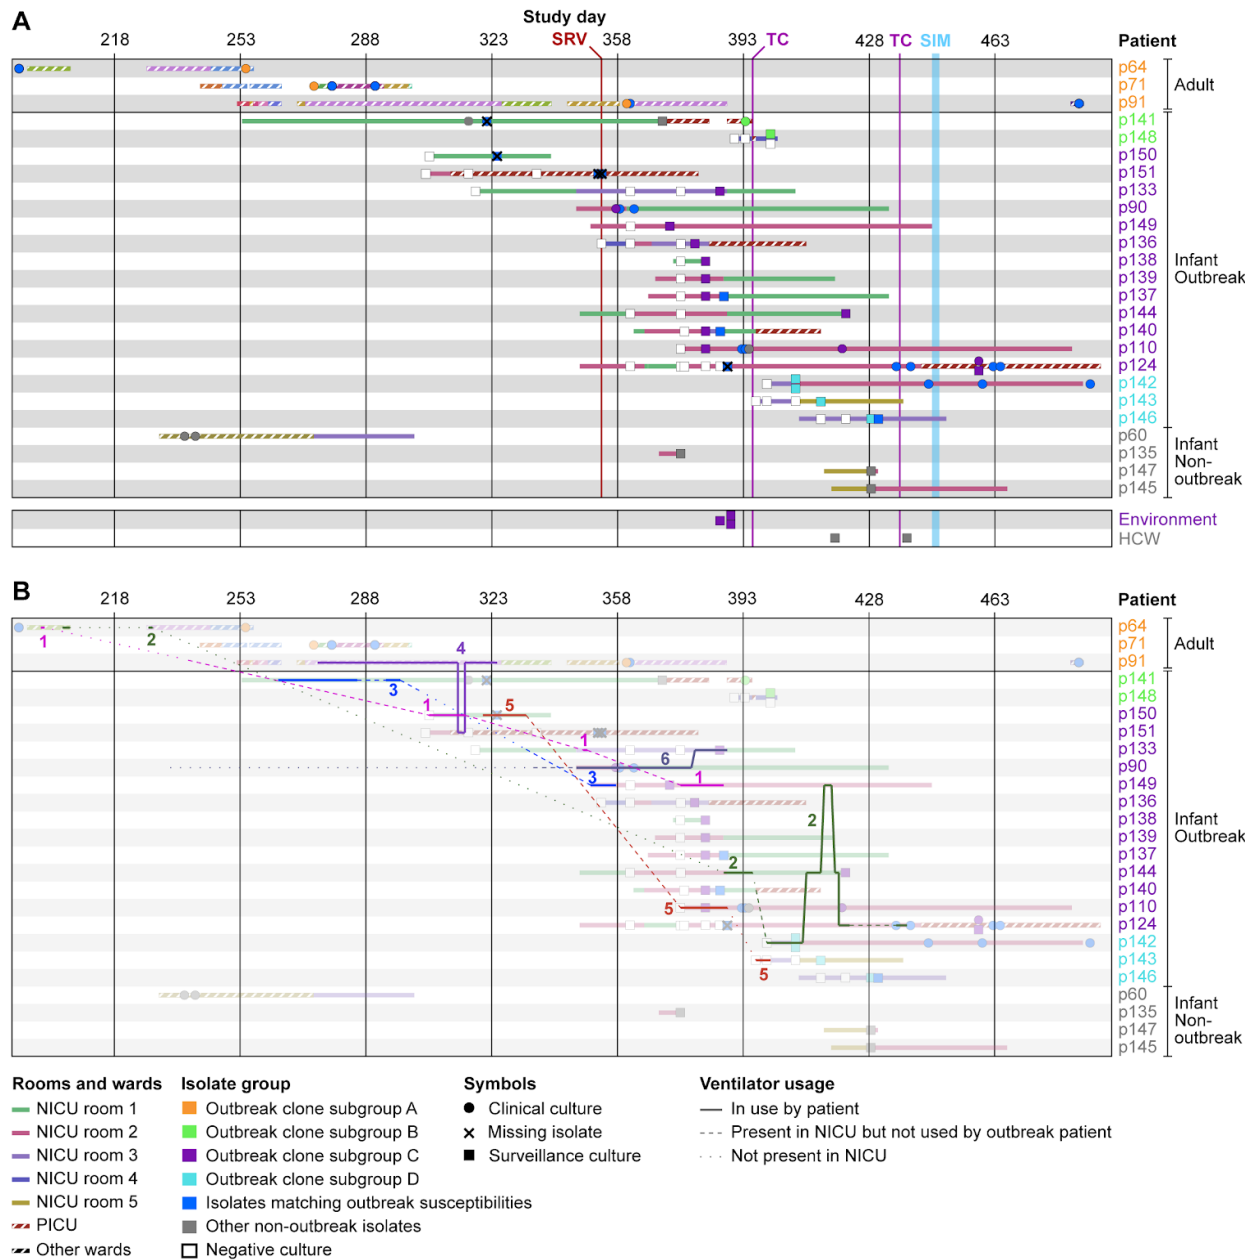

**Figure 3. Timeline of the NICU outbreak.**

**A)** Overview of outbreak patient stays and isolates collected during the NICU outbreak. Rows correspond to patients with admission periods shown as horizontal bars. Solid fill patterns denote NICU stays and striped patterns indicate stays in other MSH wards. Fill colors correspond to NICU rooms (solid) or hospital wards (striped). Clinical or surveillance isolates collected during each stay are indicated by symbols, with a key shown below. Patient identifiers and isolate symbols are colored by outbreak subgroup. Timeline scale and key interventions are shown at the top. SRV - start of biweekly surveillance cultures; TC - terminal cleaning; SIM - *in situ* simulation. **B)** Same as A, but with ventilator movements

240

245 between patients and locations overlaid as lines. Ventilators are numbered and shown in distinct colors. Solid lines correspond to periods that a ventilator was in use by an outbreak patient. Dashed lines indicate when a ventilator was present in the NICU but not used by an outbreak patient. Dotted lines indicate when a ventilator was not in use by an outbreak patient and not present in the NICU. Background colors are muted to facilitate tracking of ventilator movements.

The increase in new cases on surveillance prompted a terminal clean (TC) of the NICU  
250 on day 395. During this time, all infants were temporarily transferred to two different locations. Infant p148 who was colonized with the outbreak clone was placed across the hall from p141 in the pediatric intensive care unit (PICU). A positive surveillance culture in the same subgroup (B) as p141 was obtained for p148 shortly afterwards (**Fig. 3A**), suggesting that a transmission had occurred during the TC. New positive surveillance cultures were subsequently found for three  
255 additional infants (p142, p143 and p146). Each had been admitted after the TC and stayed in room 3 before or at the time of culture positivity. Their isolates comprised subgroup D, suggesting that the outbreak clone spread to this location from the closely related subgroup C linked to room 2 (**Fig. 2B, 3A**). Thus, each outbreak subgroup (A-D) was associated with a specific area (adult wards, PICU, and NICU rooms 2 and 3, respectively), indicating that location  
260 sharing was a dominant factor in the spread of the outbreak clone.

The continued transmissions after the first TC prompted *in situ* simulation and a second TC (**Fig. 3A**). The simulation efforts reinforced the importance of compliance to infection prevention strategies, patient cohorting, enhanced environmental disinfection, and limiting patient census to decrease bioburden (Gibbs et al. 2018). Only one new case (p124) was  
265 detected after the second TC. Infant p124 was located the PICU at the time of detection and based on the genomic profile (subgroup C) and earlier positive isolates, the transmission was believed to have occurred prior to the final TC and *in situ* simulation. As such, the workflow improvements were effective in halting the outbreak. The weekly surveillance cultures ended after three consecutive weeks of negative cultures on day 452. The last colonized patient was

270 discharged two months later, and we did not detect the outbreak clone in our hospital-wide genomic screening program in the subsequent two years. While the majority of cases were positive by surveillance, there was morbidity related to the outbreak; five infants developed clinical infections, with three bacteremias, one pneumonia, and one surgical site infection. There were no deaths related to the outbreak.

#### 275 Role of ventilator sharing in the NICU outbreak

Location and HCW sharing could not account for the link between adult and pediatric cases, which were housed in different buildings and cared for by different HCWs. We focused on a potential role of ventilators in the outbreak based on the observations that: *i*) all NICU outbreak cases were on invasive or non-invasive ventilator support prior to culture positivity; *ii*) the three 280 adult patients were ventilated for at least part of their hospitalizations; and *iii*) prior to identification of the NICU outbreak ventilators were shared between adult and pediatric wards. Ventilator exchange between units was discontinued after the first NICU cases were identified.

The ventilators present in the NICU during environmental surveillance tested negative for MRSA, but we could not rule out earlier contamination or contributions of other ventilators. 285 Analysis of equipment usage logs and tracking data provided by the hospital's real-time location system (RTLS) identified six units that were shared between outbreak cases (**Fig. 3B**, numbered 1-6). Ventilator 1 was briefly used by adult p64 and then transferred to several locations before it was moved into the NICU and later used by infant p150. The first NICU isolate that matched the outbreak clone by antibiogram was isolated from this patient soon after 290 (**Fig. 3A, B**). Ventilator 4 was used by adult p91 several weeks before this patient developed bacteremia, except for a 2-day period when it was used by infant p151, shortly before the first NICU outbreak case (**Fig. 3B**). Infant p151 was in the neighboring PICU at this time and

remained there until a positive surveillance isolate was obtained. Finally, ventilator 2 was used by adult p64 in two separate hospital visits, but was only moved to the NICU after the outbreak  
295 had already spread there.

Within the NICU, the sequential use of ventilator 6 by patient p90 and p133, the timing of their respective culture positivity, and the similarity of their isolate genomes, all supported a role for this ventilator in the transmission to p133. Likewise, ventilators 2 and/or 5 may have been a factor in the spread from room 2 (subgroup C) to room 3 (subgroup D), especially considering  
300 that both rooms were cleaned just prior to the transmission (**Fig. 3A**). Ventilator 5 may also have been a transmission vector from p150 to p110. Ventilator 3 was used by p141 and later by p149; however, it is unclear if it played a role in the outbreak, as the first two isolates obtained from p141 after ventilator 3 exposure did not match the outbreak. Altogether, the epidemiological and genomic data suggest that ventilators not only played a role in spreading the outbreak from  
305 adult wards to the NICU but were also a factor in subsequent sub-transmissions within the NICU.

#### Mutations in the outbreak clone alter expression of virulence and persistence factors

Given the extended duration of the outbreak we next sought to identify genomic features that could have contributed to its persistence. A comparison of complete genomes found 42  
310 non-synonymous or deleterious SNVs and indels in the outbreak clone that were not present in any of the ST105 hospital background strains, affecting 35 genes or their promoter regions (**Fig. 4A**). The products of these genes were primarily involved in nucleotide, amino acid and energy metabolism, as well as environmental signal processing and drug resistance. Several genes encoding cell wall proteins were also affected, including *gatD*, which is involved in amidation of  
315 peptidoglycan (Figueiredo et al. 2012).

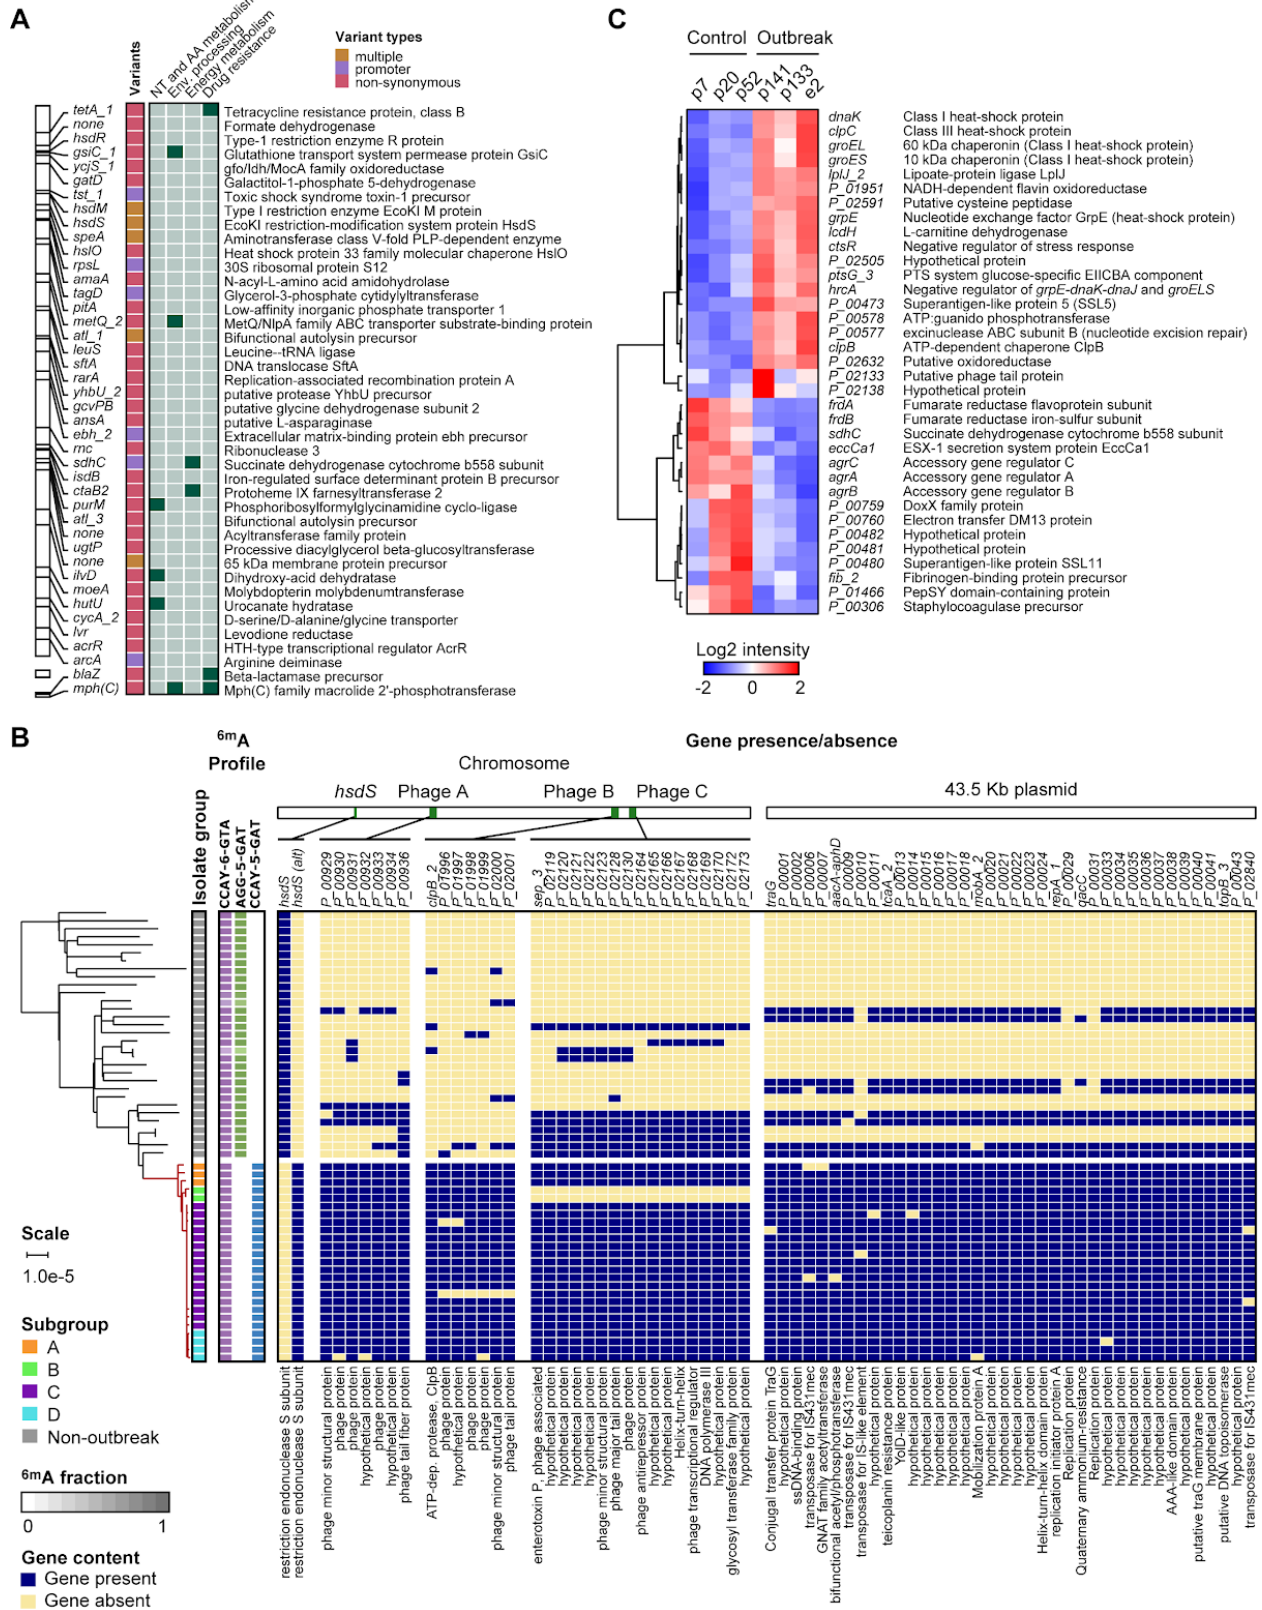



**Figure 4. Differentiating features of the NICU outbreak clone compared to the USA100 background.**

**A)** Map of non-synonymous SNVs in genes and promoter regions that are unique to the outbreak clone. Gene identifiers or names are shown next to their genomic location. The SNV type is indicated by colors with a key shown at the top-right. KEGG pathways with two or more genes are indicated on the right (green boxes) and corresponding gene descriptions on the far-right. **B)** Pan-genome analysis of MLST105 isolates showing all genes present in the outbreak clone and absent from at least half of the non-outbreak isolates collected during our study. A maximum-likelihood phylogenetic tree based on SNV distances in core genome alignments is shown on the left with patient (p) or environmental (e) isolate identifiers. Changes in the <sup>6m</sup>A methylation profile due to the *HsdS* recombination in the outbreak strain are highlighted in green/blue. Gene presence (yellow) or absence (red) is indicated in a matrix organized by genomic location (top). Gene names and descriptions are shown at the top and bottom of the matrix, respectively. See key on bottom left for more details. **C)** Hierarchical clustering of 35 genes with significant expression differences (FDR  $q < 0.05$ ) between three control and three outbreak strains. Columns correspond to control or outbreak isolates, with labels at the top. Gene names and descriptions are shown on the right. Color shades and intensity represent the difference in normalized log<sub>2</sub> counts per million (CPM) relative to the average gene expression level, with a color key shown below.

Pan-genome analysis with Roary (Page et al. 2015) further revealed 71 genes exclusive to the outbreak strain or infrequently (<33%) present in other MLST105 isolates (**Fig. 4B**). Most of these genes were associated with three prophage regions and a 43.5 kbp plasmid. The additional genes in prophage A encoded only phage replication or hypothetical proteins. Among the genes in prophage B was an extra copy of *clpB*, which promotes stress tolerance, intracellular replication and biofilm formation (Frees et al. 2004). Prophage C included an extra copy of the *sep* gene encoding an enterotoxin P-like protein associated with an increased risk of MRSA bacteremia in colonized patients (Calderwood et al. 2014). The 43.5 kbp plasmid contained the mupirocin (*mupA*), and gentamicin (*aacA-aphD*) resistance genes (**Supplemental Fig. 5B**) that explained the distinct susceptibility profile of the outbreak clone. High-level mupirocin resistance (HLR) conferred by *mupA* has been linked to transmissions in previous studies (Hodgson et al. 1994; Udo et al. 2001). Pan-genome analysis also revealed a unique variant of the *HsdS* gene in the outbreak strain, which encodes the specificity subunit of a Type I restriction modification (RM) system. Closer examination revealed that a recombination event in one of the DNA recognition sites (**Supplemental Fig. 7**) changed a target recognition domain

from the typical CC5 domains, “BD” (“AGG-5-GAT” present at 738 sites, overlapping 595 genes and 120 promoter regions) to “AD” (CCAY-5-GAT present at 304 sites, overlapping 287 genes and 15 promoter regions), resulting in altered genome-wide <sup>6m</sup>A DNA methylation profiles compared to other ST105 isolates (**Fig. 4B**).

We reasoned that the (epi)genetic changes in the outbreak clone could alter gene expression patterns and provide further insights into the effects of these changes. We therefore compared the gene expression profiles of three representative outbreak isolates (i.e., cases) to the three most similar non-outbreak ST105 strains (i.e., controls) during late-log phase growth. The control strains shared the 43.5 kbp plasmid and most of the prophage elements with the outbreak strain and demonstrated similar growth characteristics (**Supplemental Fig. 7**). Differential gene expression analysis showed altered expression of 35 genes (**Fig. 4C**). Two of these genes were mutated in the outbreak clone; a SNP in promoter region of *sdhC* and a duplication of *clpB*. Methylation changes were found in six genes (17.1%), which was lower than the rate of 27.3% across all genes. Thus, most expression changes appear to be indirect results of (epi)genetic changes. Multiple upregulated genes in the outbreak clone encoded proteins involved in stress and heat shock responses. This included *clpB*, which was increased in copy number in the outbreak vs. control strains, but also *dnaK* and *clpC*, which have been linked to biofilm formation in *S. aureus* and adherence to eukaryotic cells (Singh et al. 2012; Chatterjee et al. 2005). Expression of the gene encoding staphylococcal superantigen-like protein 5 (SSL5) was also increased. SSL5 is known to inhibit leukocyte activation by chemokines and anaphylatoxins (Bestebroer et al. 2009). Among the downregulated genes, the *agrABC* genes of the accessory gene regulator (*agr*) locus stood out. *Agr* is the major virulence regulator in *S. aureus* (Novick 2003) and decreased *agr* function in clinical isolates is associated with attenuated virulence and increased biofilm and surface protein expression (Shopsin and Copin

2018). Taken together, the nature of the genetic and expression changes in the outbreak clone indicate they may have contributed to its persistence.

## Discussion

375 In this study we implemented a complete genome screening program at a large quaternary urban medical center, with the aim of tracking circulating clones, to identify transmission events, and to understand the genomic epidemiology of endemic strains impacting human health. To our knowledge, this is the largest set of clinical MRSA isolates from bacteremic patients to undergo complete genome assembly to date. The availability of complete genomes allowed us  
380 to precisely map all genetic changes between strains highlighting the presence of substantial structural variation in lineages that are commonly considered to be highly clonal. The extent of variation due to recombinations in prophages, mobilization of genetic elements, and large genomic inversions also impacted classical *spa*, MLST and signature virulence and resistance elements used in *S. aureus* molecular typing schemes. As such, the stability of these elements  
385 should be considered when using such schemes for lineage analysis. Complete reconstruction of outbreak genomes provided additional variation data to map sub-transmission events during a NICU MRSA outbreak. Finally, the combination of genetic and gene expression differences between the NICU outbreak clone and USA100 hospital background revealed genomic features that may have contributed to its persistence.

390 Much of the accessory genome variation occurred in prophage elements, further underscoring their importance in *S. aureus* genome organization (Xia and Wolz 2014). We also show that prophages are common drivers of large chromosomal inversions, with evidence of multiple independent events throughout the phylogeny. Inversions were much more frequent in CC5 and USA100, which may reflect higher similarity between endogenous prophages and/or

395 the increased divergence between isolates in the USA100 lineage. Most inversions could only  
be resolved by long-read sequencing data, and our results, combined with our previous  
observations among MSSA isolates (Altman et al. 2018), suggest that prophage-mediated  
recombinations may be more frequent than previously appreciated. Indeed, one inversion event  
occurred in the outbreak clone during the spread from the adult wards to the NICU. The impact  
400 of genomic inversions on *S. aureus* and their clinical relevance is unclear and will require further  
study, but they likely explain the highly chimeric and mosaic structure of *S. aureus* prophages.  
Notably, non-reciprocal double break-and-join or long gene conversion events can facilitate  
sequence exchanges between prophages (Fortier and Sekulovic 2013). This could lead to the  
reshuffling of virulence genes and a wider horizontal spread as they become incorporated in  
405 phages with different host ranges.

Complete genome analysis of the outbreak clone revealed a pattern of genetic changes  
that matched patient locations, suggesting that transmission bottlenecks and local  
environmental contamination led to a unique genetic signature at each site. Some isolates and  
isolate subgroups were separated by >10 variants, which is relatively high considering a  
410 reported core genome mutation rate of 2.7-3.3 mutations per Mb per year (Harris et al. 2010;  
Young et al. 2012). This suggests that the outbreak may have originated from a genetically  
heterogeneous source, such as a patient with a history of persistent MRSA colonization that  
accumulated intra-host variants. It is also possible that the combination of selection pressures  
and transmission bottlenecks contributed to the diversification of the outbreak clone.  
415 Considering all available data, we think the most likely scenario is that the NICU outbreak  
originated from patient p64 and then spread to other adult patients through direct or indirect  
contact in shared wards. Ventilator 1, used by adult p64 and infant p150, is the most likely  
vector for entry into the NICU. Ventilator 4 may have provided a potential second entry route via

p151, with subsequent transmissions to p141 and p148 (p151 and p141 had an overlapping  
420 stay in the PICU). Such a secondary introduction may explain why the p141 and p148 isolates  
were more distantly related to all other NICU isolates, but we were not able to test this scenario  
as the isolates from p151 were no longer available. All subsequent cases could be explained by  
location relative to other MRSA colonized patients or sharing of MRSA-exposed ventilators.

The outbreak strain genome differed from the hospital background by multiple mutations  
425 of core genes, as well as accessory gene gain and loss. Hundreds of genes were impacted by  
DNA methylation changes in the gene body or promoter regions, but such genes were depleted  
rather than enriched among differentially expressed genes. As such, the impact of the  
methylation changes on the outbreak clone (if any) was unclear. Nonetheless, a common theme  
among the genetic and expression changes was the relevance of genes involved in biofilm  
430 formation, persistence and quorum sensing. Although the collective impact of the mutations will  
require further investigation, we speculate that these changes may have contributed an  
increased persistence of the outbreak clone in the environment.

Complete genome data from our hospital-wide screening program provided key  
information for outbreak management that could not have been obtained by molecular typing.  
435 First, it provided conclusive differentiation of outbreak from non-outbreak isolates, which helped  
delineate the final case set and determine when the outbreak ended. Second, analysis of all  
genetic differences between outbreak cases allowed us to identify sub-transmissions and better  
understand the chain of events that led to each sub-transmission. Third, the availability of  
hospital-wide genomic surveillance data indicated that the NICU outbreak originated much  
440 earlier in unrelated adult wards in a different building and helped identify ventilators as likely  
transmission vectors.

There are some limitations to our study. Our genomic survey was limited to first positive single-patient bacteremias and transmission rates may be increased when considering non-blood isolates. Moreover, by sequencing single colony isolates we likely did not fully  
445 capture intra-host heterogeneity. Although such heterogeneity may be less common among bacteremias, we did encounter variation within some patients which was considered when establishing our transmission thresholds. Finally, while we believe that we have reconstructed the most likely transmission routes and vectors for the NICU outbreak, it is possible that other factors such as spread by HCWs and/or other vectors contributed as well.

450 In conclusion, we find that the application of complete genome sequencing in the clinical space provides significant benefits for infection prevention and control. In addition to providing contemporary data on the genomic characteristics of circulating lineages, directed intervention and containment of identified transmission events can help prevent further outbreak progression. Although our screening program was limited in scope to bacteremias, early  
455 detection of a transmission event between the adult and NICU ward could conceivably have allowed staff to intervene earlier. Completely finished genomes also provide the ability to identify unique elements of particular strains. Accumulating a larger repository of complete and unique genome references and variants associated with successful spreading strains may be key to future outbreak detection and prevention programs by providing high-resolution feature sets for  
460 prospective and retrospective data mining purposes.

## Methods

### Ethics statement

This study was reviewed and approved by the Institutional Review Board of the Icahn School of Medicine at Mount Sinai, and the MSH Pediatric Quality Improvement Committee.

465

### Case review

An investigation of the characteristics of the patients included review of existing medical records for relevant clinical data. Unique ventilator identification numbers and the real-time location system (RTLS) enabled mapping of ventilator locations over time.

### Bacterial isolate identification and susceptibility testing.

470 Isolates were grown and identified as part of standard clinical testing procedures in the Mount Sinai Hospital Clinical Microbiology Laboratory (CML), and stored in tryptic soy broth (TSB) with 15% glycerol at -80°C. VITEK 2 (bioMérieux) automated broth microdilution antibiotic susceptibility profiles were obtained for each isolate according to Clinical and Laboratory Standards Institute (CLSI) 2015 guidelines and reported according to CLSI guidelines (Wayne  
475 2015). Susceptibility to mupirocin was determined by E-test (bioMérieux) and susceptibility to chlorhexidine was tested with discs (Hardy) impregnated with 5 µl of a 20% chlorhexidine gluconate solution (Sigma-Aldrich). Species confirmation was performed with MALDI-TOF (Bruker Biotyper, Bruker Daltonics).

### DNA preparation and sequencing

480 For each isolate, single colonies were selected and grown separately on tryptic soy agar (TSA)

plates with 5% sheep blood (blood agar) (ThermoFisher Scientific) under nonselective conditions. After growth overnight, cells underwent high molecular weight DNA extraction using the Qiagen DNeasy Blood & Tissue Kit (Qiagen, 69504) according to the manufacturer's instructions, with modified lysis conditions. Bacterial cells were lysed by suspending cells in 3  $\mu$ L  
485 of 100 mg/ml RNase A (Ambion, AM2286) and ten  $\mu$ L of 100 mg/ml lysozyme (Sigma, L1667-1G) for 30 minutes at 37°C, followed by incubation with Proteinase K for one hour at 56°C and two rounds of bead beating of one min each using 0.1mm silica beads (MP Bio) (Altman et al. 2014).

Quality control, DNA quantification, library preparation, and sequencing was performed as  
490 described previously (Altman et al. 2014). Briefly, DNA was gently sheared using Covaris G-tube spin columns into ~20,000 bp fragments, and end-repaired before ligating SMRTbell adapters (Pacific Biosciences). The resulting library was treated with an exonuclease cocktail to remove un-ligated DNA fragments, followed by two additional purification steps with AMPure XP beads (Beckman Coulter) and Blue Pippin (Sage Science) size selection to deplete SMRTbells  
495 < 7,000 bp. Libraries were then sequenced using P5 enzyme chemistry on the Pacific Biosciences RS-II platform to >200x genome-wide coverage.

### Complete genome assembly and finishing

PacBio SMRT sequencing data were assembled using a custom genome assembly and finishing pipeline (Altman et al. 2018). Briefly, sequencing data was first assembled with HGAP3  
500 version 2.2.0 (Chin et al. 2013). Contigs with less than 10x coverage and small contigs that were completely encompassed in larger contigs were removed. Remaining contigs were circularized and reoriented to the origin of replication (*ori*) using Circlator (Hunt et al. 2015), and aligned to the non-redundant nucleotide collection using BLAST+ (Camacho et al. 2009) to



identify plasmid sequences. In cases where chromosomes or plasmids did not assemble into  
505 complete circularized contigs, manual curation was performed using Contiguity (Sullivan et al.  
2015). Genes were annotated using PROKKA (Seemann 2014) and visualized using  
ChromoZoom (Pak and Roth 2013) and the Integrated Genome Browser (IGB) (Nicol et al.  
2009). Interproscan (Jones et al. 2014) was used to annotate protein domains and GO  
categories for annotated genes.

#### 510 Resolution of large genomic inversions

To resolve inversion events catalyzed by two prophage elements (*Staphylococcus phage Sa1*  
and *Staphylococcus aureus* phage Sa5 with large (>40 kbp) nearly identical regions present in  
some of the assembled genomes, we developed a phasing approach that took advantage of  
unique variants present in each element. Raw (i.e. uncorrected) PacBio reads were first  
515 mapped to one of the repeat copies using BWA-MEM (Li 2013). Variants were then called with  
Freebayes (Garrison and Marth 2012), and high-quality single nucleotide variants with two  
distinct alleles of approximately equal read coverage were identified. Analogous to procedures  
used in haplotype phasing, we then determined which variant alleles were co-located in the  
same repeat element: if at  $\frac{3}{4}$  of the raw reads containing a particular allele also encompassed  
520 distinct allele(s) of neighboring variant(s), the alleles were considered linked. In all cases this  
resulted in two distinct paths through the repeated prophage elements that were each linked to  
unique sequence flanking each repeat. We then used this information to correct assembly errors  
and identify *bona fide* inversion events between isolate genomes. Final verification of corrected  
assembly was performed by examining the phasing of the raw reads with HaploFlow  
525 (Bachmann et al. 2015).

## Phylogenetic reconstruction and molecular typing

Phylogenetic analyses were based on whole-genome alignments with parsnp (Treangen et al. 2014), using the filter for recombination. The VCF file of all variants identified by parsnp was then used to determine pairwise SNV distances between the core genomes of all strains. For  
530 visualization of the whole-genome alignments, isolate genomes were aligned using sibelia (Minkin et al. 2013) and processed by ChromatiBlocks (<http://github.com/mjsull/chromatiblocks>).

The multi-locus sequence type was determined from whole genome sequences using the RESTful interface to the PubMLST *S. aureus* database (Jolley et al. 2017). Typing of *spa* was performed using a custom script ([https://github.com/mjsull/spa\\_typing](https://github.com/mjsull/spa_typing)). SCCmec typing  
535 was done using SCCmecFinder (Kaya et al. 2018). Changes to ACME and SaPI5 were determined using BLASTN and Easyfig. Presence or absence of genes in each locus was determined using BLASTX (Altschul et al. 1990) and a gene was considered to be present if 90% of the reference sequence was aligned with at least 90% identity. Prophage regions were detected using PHASTER. Each region was then aligned to a manually curated database of *S.*  
540 *aureus* phage intergrases using BLASTx to identify their integrase group.

## Annotation of antibiotic resistance determinants

Antibiotic resistance gene and variants were annotated by comparing to a manually curated database of 39 known *S. aureus* resistance determinants for 17 antibiotics compiled from literature. BLAST (Altschul et al. 1990) was used to identify the presence of genes in each  
545 isolate genome, with sequence identity cutoff  $\geq 90\%$  and an e-value cut-off  $\leq 1e-10$ . Resistance variants were identified by BLAST alignment to the reference sequence of the antibiotic resistance determinant. Only exact matches to variants identified in literature were considered.

## Identification of transmissions

To establish similarity thresholds for complete genomes obtained from long read SMRT  
550 sequencing data we first examined baseline single nucleotide variant (SNV) distances between  
within each lineage. Median pairwise genome differences ranged from 101 SNVs for USA800 to  
284 SNVs for USA100 (**Supplemental Fig. 8A**). We also examined the extent of divergence  
among 30 bacteremia isolate pairs collected within a span of one month to 1·4 years from  
individual patients. Pairwise distances for within-patient isolates were substantially lower than  
555 the median for each lineage (**Supplemental Fig. 8B-E**), consistent with persistent carriage of  
the same clone (Young et al. 2012; Von Eiff et al. 2001), with no more than 10 SNVs separating  
isolate pairs. Small (<5 bp) indels were more common than SNVs and mostly associated with  
homopolymer regions that can be problematic to resolve with third-generation sequencing  
technologies, indicating that they likely reflected sequencing errors. Notably, several patients  
560 showed variation between isolates collected within a span of several days (**Supplemental Fig.**  
**8B-E**); indicative of intra-host genetic diversity. As such, we considered intra-host diversity and  
genetic drift in aggregate and set a conservative distance of  $\leq 7$  SNVs to define transmission  
events in our genome phylogeny.

## Identification of NICU outbreak subgroups

565 Changes between each outbreak isolate and the p133 reference isolate were identified using  
GWviz (<https://github.com/mjsull/GWviz>), which uses nucdiff (Khelik et al. 2017) to identify all  
genomic variants between pairs of strains. Nucdiff in turn uses nucmer to find alignments  
between two genomes and then identifies large structural rearrangements by looking at the  
organisation of nucmer alignments and smaller changes such as SNVs or indels by finding  
570 differences between the aligned regions. Briefly, raw PacBio reads were aligned back to each

outbreak genome assembly using BWA-MEM (Li 2013). Provarvis was then used to detect and associate variants with PROKKA gene annotations, and to determine the number and proportion of raw reads supporting variants in each strain. Variants were selected for further delineation of outbreak subgroups if they were present in two or more isolate genomes and supported by at least ten raw reads in each genome, of which at least 75% confirmed the variant.

A graph of SNV distances between isolates was obtained from a multiple alignment of all outbreak isolates. The minimum spanning tree was then constructed using the minimum spanning tree functionality in the Python library networkX (<https://networkx.github.io/>).

580 Identification of genetic variants unique to the NICU outbreak clone

To determine SNVs unique to the outbreak isolate the marginal ancestral states of the ST105 isolates were determined using RAxML (Stamatakis 2014) from a multiple alignment of all ST105s generated using Parsnp. We identified all SNVs that had accumulated from the most recent common ancestor of the outbreak strain and the closest related non-outbreak ST105, and the MRCA of all outbreak strains. SNVs causing nonsynonymous mutations or changes to the promoter region of a gene (defined as <500bp upstream of the start site) were plotted. Orthology was assigned using BLASTkoala (Kanehisa et al. 2016).

590 Core and accessory gene content in ST105 outbreak and non-outbreak strains was determined using ROARY. Genes found in more than two outbreak strains and less than 33% of the other ST105 genomes were then plotted along with select methylation data. Phylogenetic reconstruction of ST105 was performed using parsnp and the resulting tree and gene presence information was visualised using m.viridis.py (<https://github.com/mjsull/m.viridis>) which uses the python ETE toolkit (Huerta-Cepas et al. 2016).

## DNA methylation profiling

595 SMRT raw reads were mapped to the assembled genomes and processed using smrtanalysis  
v5.0 (<https://www.pacb.com/products-and-services/analytical-software/smrt-analysis/>).  
Interpulse durations (IPDs) were measured and processed as previously described (Flusberg et  
al. 2010; Fang et al. 2012) to detect modified N6-methyladenine (<sup>6m</sup>A) nucleotides.

## RNA preparation and sequencing

600 For RNA extraction, overnight cultures in tryptic soy broth (TSB) were diluted (OD<sub>600</sub> of 0.05),  
grown to late-log (OD<sub>600</sub> of ~0.80) in TSB, and stabilized in RNALater (Thermo Fisher). Total  
RNA was isolated and purified using the RNeasy Mini Kit (Qiagen) according to the  
manufacturer's instructions, except that two cycles of two-minute bead beating with 1 ml of 0.1  
mm silica beads in a mini bead-beater (BioSpec) were used to disrupt cell walls. Isolated RNA  
605 was treated with 1 μL (1 unit) of Baseline Zero DNase (Epicentre) at 37°C for 30 min, followed  
by ribosomal RNA depletion using the Epicenter Ribo-Zero Magnetic Gold Kit (Illumina),  
according to the manufacturer's instructions.

RNA quality and quantity was assessed using the Agilent Bioanalyzer and Qubit RNA  
Broad Range Assay kit (Thermo Fisher), respectively. Barcoded directional RNA-Sequencing  
610 libraries were prepared using the TruSeq Stranded Total RNA Sample Preparation kit (Illumina).  
Libraries were pooled and sequenced on the Illumina HiSeq platform in a 100 bp single-end  
read run format with six samples per lane.

## Differential gene expression analysis

Raw reads were first trimmed by removing Illumina adapter sequences from 3' ends using  
615 cutadapt (Martin 2011) with a minimum match of 32 base pairs and allowing for 15% error rate.

Trimmed reads were mapped to the reference genome using Bowtie2 (Langmead and Salzberg 2012), and htseq-count (Anders et al. 2015) was used to produce strand-specific transcript count summaries. Read counts were then combined into a numeric matrix and used as input for differential gene expression analysis with the Bioconductor EdgeR package (Robinson et al. 620 2010). Normalization factors were computed on the data matrix using the weighted trimmed mean of M-values (TMM) method (Robinson and Oshlack 2010). Data were fitted to a design matrix containing all sample groups and pairwise comparisons were performed between the groups of interest. P-values were corrected for multiple testing using the Benjamin-Hochberg (BH) method and used to select genes with significant expression differences ( $q < 0.05$ ).

## 625 Data Access

All genome data and assemblies are available on Genbank. Accession numbers are provided in **Table S1**.

## Acknowledgements

This research was supported in part by R01 AI119145 (H.v.B.), the Icahn Institute for Genomics and Data Science (A.K., E.S.), the NIAID-supported NRSA Institutional Research Training Grant for Global Health Research (T32 AI07647), the CTSA/NCATS KL2 Program (KL2TR001435, Icahn School of Medicine at Mount Sinai), and the New York State Department of Health Empire Clinical Research Investigator Program (Aberg, Icahn School of Medicine at Mount Sinai) (D.R.A.) and F30 AI122673 (T.R.P.). The funders had no role in study design, data collection 635 and interpretation, or the decision to submit the work for publication. This research was also

supported in part through the computational resources and staff expertise provided by the Department of Scientific Computing at the Icahn School of Medicine at Mount Sinai.

## Author Contributions

640 Methodology: M.J.S, D.A., H.v.B.; Data collection: M.J.S, D.A., K.C., B.C., E.W., T.R.P., G.D.,  
M.L.S., Z.K., C.B., A.R., F.S., K.G., H.v.B.; Data curation: M.J.S, D.A., K.C., B.C.; Analysis:  
M.J.S, D.A., K.C.; Figures: M.J.S, D.A., K.C., H.v.B.; Writing – original draft: M.J.S, D.A., H.v.B.;  
Writing – review & editing: All authors; Study design: M.J.S, D.A., H.v.B., K.G.; Supervision:  
H.v.B., K.G.; Project administration: H.v.B., K.G.; Funding acquisition: H.v.B., D.A., T.R.P., A.K.  
E.S..

645

## Disclosure Declaration

Dr. van Bakel reports grants from National Institutes of Health, grants from New York State Department of Health, during the conduct of the study. The funders of the study had no role in study design, data collection, data analysis, data interpretation, or writing of the manuscript. The corresponding author had full access to all study data and had final responsibility for the  
650 decision to submit for publication.

## References

- Altman DR, Sebra R, Hand J, Attie O, Deikus G, Carpini K, Patel G, Rana M, Arvelakis A, Grewal P, et al. 2014. Transmission of Methicillin-Resistant *Staphylococcus aureus* via Deceased Donor Liver Transplantation Confirmed by Whole Genome Sequencing. *Am J Transplant* **14**: 2640–2644.
- Altman DR, Sullivan MJ, Chacko KI, Balasubramanian D, Pak TR, Sause WE, Kumar K, Sebra R, Deikus G, Attie O, et al. 2018. Genome plasticity of agr-defective *Staphylococcus aureus* during clinical infection. *Infect Immun*. <http://dx.doi.org/10.1128/IAI.00331-18>.
- Altschul SF, Gish W, Miller W, Myers EW, Lipman DJ. 1990. Basic local alignment search tool. *J Mol Biol* **215**: 403–410.
- Anders S, Pyl PT, Huber W. 2015. HTSeq—a Python framework to work with high-throughput sequencing data. *Bioinformatics* **31**: 166–169.
- Arndt D, Grant JR, Marcu A, Sajed T, Pon A, Liang Y, Wishart DS. 2016. PHASTER: a better, faster version of the PHAST phage search tool. *Nucleic Acids Res* **44**: W16–21.
- Azarian T, Cook RL, Johnson JA, Guzman N, McCarter YS, Gomez N, Rathore MH, Morris JG, Salemi M. 2015. Whole-genome sequencing for outbreak investigations of methicillin-resistant *Staphylococcus aureus* in the neonatal intensive care unit: time for routine practice? *Infect Control Hosp Epidemiol* **36**: 777–785.
- Bachmann NL, Sullivan MJ, Jelocnik M, Myers GSA, Timms P, Polkinghorne A. 2015. Culture-independent genome sequencing of clinical samples reveals an unexpected



heterogeneity of infections by *Chlamydia pecorum*. *J Clin Microbiol* **53**: 1573–1581.

Benson MA, Ohneck EA, Ryan C, Alonzo F 3rd, Smith H, Narechania A, Kolokotronis S-O, Satola SW, Uhlemann A-C, Sebra R, et al. 2014. Evolution of hypervirulence by a MRSA clone through acquisition of a transposable element. *Mol Microbiol* **93**: 664–681.

675 Bestebroer J, van Kessel KPM, Azouagh H, Walenkamp AM, Boer IGJ, Romijn RA, van Strijp JAG, de Haas CJC. 2009. Staphylococcal SSL5 inhibits leukocyte activation by chemokines and anaphylatoxins. *Blood* **113**: 328–337.

Calderwood MS, Desjardins CA, Sakoulas G, Nicol R, Dubois A, Delaney ML, Kleinman K, Cosimi LA, Feldgarden M, Onderdonk AB, et al. 2014. Staphylococcal enterotoxin P  
680 predicts bacteremia in hospitalized patients colonized with methicillin-resistant *Staphylococcus aureus*. *J Infect Dis* **209**: 571–577.

Camacho C, Coulouris G, Avagyan V, Ma N, Papadopoulos J, Bealer K, Madden TL. 2009. BLAST+: architecture and applications. *BMC Bioinformatics* **10**: 421.

Chatterjee I, Becker P, Grundmeier M, Bischoff M, Somerville GA, Peters G, Sinha B, Harraghy  
685 N, Proctor RA, Herrmann M. 2005. *Staphylococcus aureus* ClpC is required for stress resistance, aconitase activity, growth recovery, and death. *J Bacteriol* **187**: 4488–4496.

Chin CS, Alexander DH, Marks P, Klammer AA, Drake J, Heiner C, Clum A, Copeland A, Huddleston J, Eichler EE, et al. 2013. Nonhybrid, finished microbial genome assemblies from long-read SMRT sequencing data. *Nat Methods* **10**: 563–569.

690 Copin R, Shopsin B, Torres VJ. 2017. After the deluge: mining *Staphylococcus aureus* genomic data for clinical associations and host-pathogen interactions. *Curr Opin Microbiol* **41**:

43–50.

DeLeo FR, Chambers HF. 2009. Reemergence of antibiotic-resistant *Staphylococcus aureus* in the genomics era. *J Clin Invest* **119**: 2464–2474.

695 DeLeo FR, Otto M, Kreiswirth BN, Chambers HF. 2010. Community-associated  
meticillin-resistant *Staphylococcus aureus*. *Lancet* **375**: 1557–1568.

Diep BA, Gill SR, Chang RF, Phan TH, Chen JH, Davidson MG, Lin F, Lin J, Carleton HA, Mongodin EF, et al. 2006. Complete genome sequence of USA300, an epidemic clone of community-acquired meticillin-resistant *Staphylococcus aureus*. *Lancet* **367**: 731–739.

700 Eyre DW, Golubchik T, Gordon NC, Bowden R, Piazza P, Batty EM, Ip CL, Wilson DJ, Didelot X, O'Connor L, et al. 2012. A pilot study of rapid benchtop sequencing of *Staphylococcus aureus* and *Clostridium difficile* for outbreak detection and surveillance. *BMJ Open* **2**.  
<http://dx.doi.org/10.1136/bmjopen-2012-001124>.

Fang G, Munera D, Friedman DI, Mandlik A, Chao MC, Banerjee O, Feng Z, Losic B, Mahajan  
705 MC, Jabado OJ, et al. 2012. Genome-wide mapping of methylated adenine residues in pathogenic *Escherichia coli* using single-molecule real-time sequencing. *Nat Biotechnol* **30**:  
1232–1239.

Figueiredo TA, Sobral RG, Ludovice AM, Almeida JMF de, Bui NK, Vollmer W, de Lencastre H, Tomasz A. 2012. Identification of genetic determinants and enzymes involved with the  
710 amidation of glutamic acid residues in the peptidoglycan of *Staphylococcus aureus*. *PLoS Pathog* **8**: e1002508.

Flusberg BA, Webster DR, Lee JH, Travers KJ, Olivares EC, Clark TA, Korfach J, Turner SW.

2010. Direct detection of DNA methylation during single-molecule, real-time sequencing. *Nat Methods* **7**: 461–465.
- 715 Fortier L-C, Sekulovic O. 2013. Importance of prophages to evolution and virulence of bacterial pathogens. *Virulence* **4**: 354–365.
- Frees D, Chastanet A, Qazi S, Sørensen K, Hill P, Msadek T, Ingmer H. 2004. Clp ATPases are required for stress tolerance, intracellular replication and biofilm formation in *Staphylococcus aureus*. *Mol Microbiol* **54**: 1445–1462.
- 720 Garrison E, Marth G. 2012. Haplotype-based variant detection from short-read sequencing. *arXiv [q-bioGN]*. <http://arxiv.org/abs/1207.3907>.
- Gibbs K, DeMaria S, McKinsey S, Fede A, Harrington A, Hutchison D, Torchen C, Levine A, Goldberg A. 2018. A Novel In Situ Simulation Intervention Used to Mitigate an Outbreak of Methicillin-Resistant *Staphylococcus aureus* in a Neonatal Intensive Care Unit. *J Pediatr* **194**: 22–27.e5.
- 725 Glaser P, Martins-Simões P, Villain A, Barbier M, Tristan A, Bouchier C, Ma L, Bes M, Laurent F, Guillemot D, et al. 2016. Demography and Intercontinental Spread of the USA300 Community-Acquired Methicillin-Resistant *Staphylococcus aureus* Lineage. *MBio* **7**: e02183–15.
- 730 Grundmann H, Aires-de-Sousa M, Boyce J, Tiemersma E. 2006. Emergence and resurgence of methicillin-resistant *Staphylococcus aureus* as a public-health threat. *Lancet* **368**: 874–885.
- Harris SR, Feil EJ, Holden MTG, Quail MA, Nickerson EK, Chantratita N, Gardete S, Tavares A, Day N, Lindsay JA, et al. 2010. Evolution of MRSA during hospital transmission and

intercontinental spread. *Science* **327**: 469–474.

- 735 Hodgson JE, Curnock SP, Dyke KG, Morris R, Sylvester DR, Gross MS. 1994. Molecular characterization of the gene encoding high-level mupirocin resistance in *Staphylococcus aureus* J2870. *Antimicrob Agents Chemother* **38**: 1205–1208.
- Huerta-Cepas J, Serra F, Bork P. 2016. ETE 3: Reconstruction, Analysis, and Visualization of Phylogenomic Data. *Mol Biol Evol* **33**: 1635–1638.
- 740 Hunt M, Silva ND, Otto TD, Parkhill J, Keane JA, Harris SR. 2015. Circlator: automated circularization of genome assemblies using long sequencing reads. *Genome Biol* **16**: 294.
- Jolley KA, Bray JE, Maiden MCJ. 2017. A RESTful application programming interface for the PubMLST molecular typing and genome databases. *Database* **2017**.  
<http://dx.doi.org/10.1093/database/bax060>.
- 745 Jones P, Binns D, Chang H-Y, Fraser M, Li W, McAnulla C, McWilliam H, Maslen J, Mitchell A, Nuka G, et al. 2014. InterProScan 5: genome-scale protein function classification. *Bioinformatics* **30**: 1236–1240.
- Kanehisa M, Sato Y, Morishima K. 2016. BlastKOALA and GhostKOALA: KEGG Tools for Functional Characterization of Genome and Metagenome Sequences. *J Mol Biol* **428**:  
750 726–731.
- Kaya H, Hasman H, Larsen J, Stegger M, Johannesen TB, Allesøe RL, Lemvig CK, Aarestrup FM, Lund O, Larsen AR. 2018. SCCmecFinder, a Web-Based Tool for Typing of Staphylococcal Cassette Chromosome mec in *Staphylococcus aureus* Using Whole-Genome Sequence Data. *mSphere* **3**. <http://dx.doi.org/10.1128/mSphere.00612-17>.

- 755 Khelik K, Lagesen K, Sandve GK, Rognes T, Nederbragt AJ. 2017. NucDiff: in-depth  
characterization and annotation of differences between two sets of DNA sequences. *BMC  
Bioinformatics* **18**: 338.
- Klevens RM, Morrison MA, Nadle J, Petit S, Gershman K, Ray S, Harrison LH, Lynfield R,  
Dumyati G, Townes JM, et al. 2007. Invasive methicillin-resistant *Staphylococcus aureus*  
760 infections in the United States. *JAMA* **298**: 1763–1771.
- Köser CU, Holden MTG, Ellington MJ, Cartwright EJP, Brown NM, Ogilvy-Stuart AL, Hsu LY,  
Chewapreecha C, Croucher NJ, Harris SR, et al. 2012. Rapid whole-genome sequencing  
for investigation of a neonatal MRSA outbreak. *N Engl J Med* **366**: 2267–2275.
- Langmead B, Salzberg SL. 2012. Fast gapped-read alignment with Bowtie 2. *Nat Methods* **9**:  
765 357–359.
- Li H. 2013. Aligning sequence reads, clone sequences and assembly contigs with BWA-MEM.  
*arXiv [q-bioGN]*. <http://arxiv.org/abs/1303.3997>.
- Lindsay JA, Holden MT. 2004. *Staphylococcus aureus*: superbug, super genome? *Trends  
Microbiol* **12**: 378–385.
- 770 Madoui M-A, Engelen S, Cruaud C, Belser C, Bertrand L, Alberti A, Lemainque A, Wincker P,  
Aury J-M. 2015. Genome assembly using Nanopore-guided long and error-free DNA reads.  
*BMC Genomics* **16**: 327.
- Martin M. 2011. Cutadapt removes adapter sequences from high-throughput sequencing reads.  
*EMBnet.journal* **17**: 10–12.
- 775 Minkin I, Patel A, Kolmogorov M, Vyahhi N, Pham S. 2013. Sibelia: A Scalable and

Comprehensive Synteny Block Generation Tool for Closely Related Microbial Genomes. In *Algorithms in Bioinformatics*, pp. 215–229, Springer Berlin Heidelberg.

780 Montgomery CP, Boyle-Vavra S, Daum RS. 2009. The arginine catabolic mobile element is not associated with enhanced virulence in experimental invasive disease caused by the community-associated methicillin-resistant *Staphylococcus aureus* USA300 genetic background. *Infect Immun* **77**: 2650–2656.

785 Mwangi MM, Wu SW, Zhou Y, Sieradzki K, de Lencastre H, Richardson P, Bruce D, Rubin E, Myers E, Siggia ED, et al. 2007. Tracking the in vivo evolution of multidrug resistance in *Staphylococcus aureus* by whole-genome sequencing. *Proc Natl Acad Sci U S A* **104**: 9451–9456.

Nicol JW, Helt GA, Blanchard SG Jr, Raja A, Loraine AE. 2009. The Integrated Genome Browser: free software for distribution and exploration of genome-scale datasets. *Bioinformatics* **25**: 2730–2731.

790 Novick RP. 2003. Autoinduction and signal transduction in the regulation of staphylococcal virulence. *Mol Microbiol* **48**: 1429–1449.

Page AJ, Cummins CA, Hunt M, Wong VK, Reuter S, Holden MTG, Fookes M, Falush D, Keane JA, Parkhill J. 2015. Roary: rapid large-scale prokaryote pan genome analysis. *Bioinformatics* **31**: 3691–3693.

795 Pak TR, Roth FP. 2013. ChromoZoom: a flexible, fluid, web-based genome browser. *Bioinformatics* **29**: 384–386.

Pardos de la Gandara M, Curry M, Berger J, Burstein D, Della-Latta P, Kopetz V, Quale J,

- Spitzer E, Tan R, Urban C, et al. 2016. MRSA Causing Infections in Hospitals in Greater Metropolitan New York: Major Shift in the Dominant Clonal Type between 1996 and 2014. *PLoS One* **11**: e0156924.
- 800 Planet PJ, Diaz L, Kolokotronis S-O, Narechania A, Reyes J, Xing G, Rincon S, Smith H, Panesso D, Ryan C, et al. 2015. Parallel Epidemics of Community-Associated Methicillin-Resistant *Staphylococcus aureus* USA300 Infection in North and South America. *J Infect Dis* **212**: 1874–1882.
- Price J, Gordon NC, Crook D, Llewelyn M, Paul J. 2013. The usefulness of whole genome  
805 sequencing in the management of *Staphylococcus aureus* infections. *Clin Microbiol Infect* **19**: 784–789.
- Robinson MD, McCarthy DJ, Smyth GK. 2010. edgeR: a Bioconductor package for differential expression analysis of digital gene expression data. *Bioinformatics* **26**: 139–140.
- Robinson MD, Oshlack A. 2010. A scaling normalization method for differential expression  
810 analysis of RNA-seq data. *Genome Biol* **11**: R25.
- Seemann T. 2014. Prokka: rapid prokaryotic genome annotation. *Bioinformatics* **30**: 2068–2069.
- Sela U, Euler CW, Correa da Rosa J, Fischetti VA. 2018. Strains of bacterial species induce a greatly varied acute adaptive immune response: The contribution of the accessory genome. *PLoS Pathog* **14**: e1006726.
- 815 Senn L, Clerc O, Zanetti G, Basset P, Prod'hom G, Gordon NC, Sheppard AE, Crook DW, James R, Thorpe HA, et al. 2016. The Stealthy Superbug: the Role of Asymptomatic Enteric Carriage in Maintaining a Long-Term Hospital Outbreak of ST228

Methicillin-Resistant *Staphylococcus aureus*. *MBio* **7**: e02039–15.

820 Shopsin B, Copin R. 2018. *Staphylococcus aureus* Adaptation During Infection. In *Antimicrobial Resistance in the 21st Century* (eds. I.W. Fong, D. Shlaes, and K. Drlica), pp. 431–459, Springer International Publishing, Cham.

Singh VK, Syring M, Singh A, Singhal K, Dalecki A, Johansson T. 2012. An insight into the significance of the DnaK heat shock system in *Staphylococcus aureus*. *Int J Med Microbiol* **302**: 242–252.

825 Snitkin ES, Zelazny AM, Thomas PJ, Stock F, NISC Comparative Sequencing Program Group, Henderson DK, Palmore TN, Segre JA. 2012. Tracking a hospital outbreak of carbapenem-resistant *Klebsiella pneumoniae* with whole-genome sequencing. *Sci Transl Med* **4**: 148ra116.

830 Stamatakis A. 2014. RAxML version 8: a tool for phylogenetic analysis and post-analysis of large phylogenies. *Bioinformatics* **30**: 1312–1313.

Sullivan MJ, Ben Zakour NL, Forde BM, Stanton-Cook M, Beatson SA. 2015. Contiguity: Contig adjacency graph construction and visualisation. *PeerJ PrePrints* **3**: e1273.

835 Treangen TJ, Ondov BD, Koren S, Phillippy AM. 2014. The Harvest suite for rapid core-genome alignment and visualization of thousands of intraspecific microbial genomes. *Genome Biol* **15**: 524.

Udo EE, Jacob LE, Mathew B. 2001. Genetic analysis of methicillin-resistant *Staphylococcus aureus* expressing high- and low-level mupirocin resistance. *J Med Microbiol* **50**: 909–915.

Uhlemann A-C, Dordel J, Knox JR, Raven KE, Parkhill J, Holden MTG, Peacock SJ, Lowy FD.



2014. Molecular tracing of the emergence, diversification, and transmission of *S. aureus*  
840 sequence type 8 in a New York community. *Proc Natl Acad Sci U S A* **111**: 6738–6743.
- Von Eiff C, Becker K, Machka K, Stammer H, Peters G. 2001. Nasal carriage as a source of  
Staphylococcus aureus bacteremia. *N Engl J Med* **344**: 11–16.
- Wayne PA. 2015. CLSI. Performance Standards for Antimicrobial Susceptibility Testing;  
Twenty-Fifth Informational Supplement. *CLSI Document M100-S25, Clinical and Laboratory*  
845 *Standards Institute*.
- Williams LE, Detter C, Barry K, Lapidus A, Summers AO. 2006. Facile recovery of individual  
high-molecular-weight, low-copy-number natural plasmids for genomic sequencing. *Appl*  
*Environ Microbiol* **72**: 4899–4906.
- Xia G, Wolz C. 2014. Phages of Staphylococcus aureus and their impact on host evolution.  
850 *Infect Genet Evol* **21**: 593–601.
- Young BC, Golubchik T, Batty EM, Fung R, Lerner-Svensson H, Votintseva AA, Miller RR,  
Godwin H, Knox K, Everitt RG, et al. 2012. Evolutionary dynamics of Staphylococcus  
aureus during progression from carriage to disease. *Proc Natl Acad Sci U S A* **109**:  
4550–4555.
